# Supplementary material for: Ecological memory and relocation decisions in fungal mycelial networks: responses to quantity and location of new resources
Source: PubMed Central journal article supplement (PMC6976561; doi:10.1038/s41396-019-0536-3), 2019-10-18
Supplement: 41396_2019_536_MOESM1_ESM.pdf [file 41396_2019_536_MOESM1_ESM.pdf]

## Period I (48 days)

### Inoculum

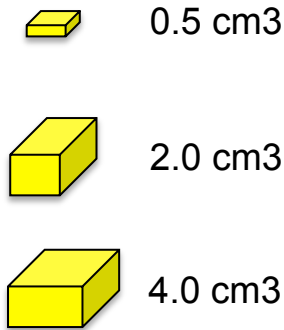

### Bait

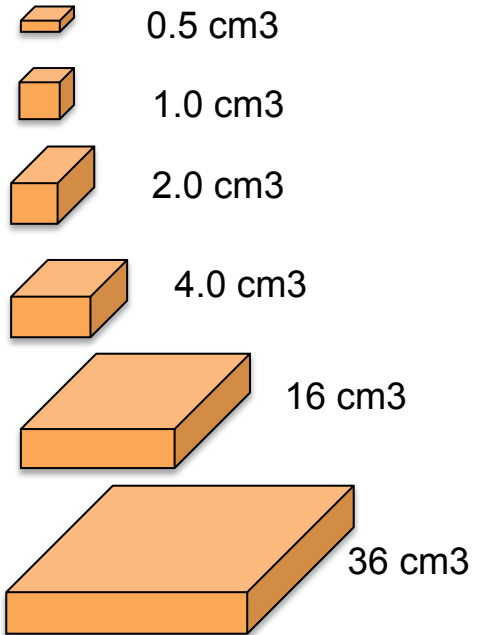

### Soil tray microcosm

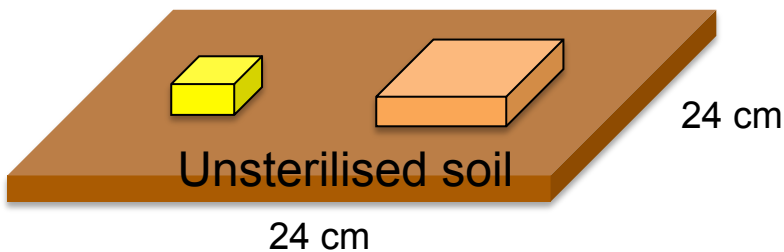

All combinations of inoculum and bait wood sizes were tested.

## Period II (8 days)

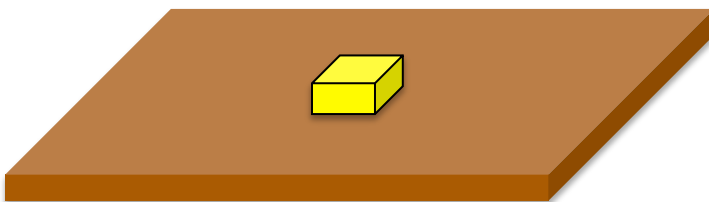

Inoculum woods were transferred to the center of new soil trays.

Fig. S1 Schematic diagram of the microcosm design and experimental set up.
