# Supplementary material for: Ecological memory and relocation decisions in fungal mycelial networks: responses to quantity and location of new resources
Source: PubMed Central journal article supplement (PMC6976561; doi:10.1038/s41396-019-0536-3), 2019-10-18
Supplement: 41396_2019_536_MOESM2_ESM.pdf [file 41396_2019_536_MOESM2_ESM.pdf]

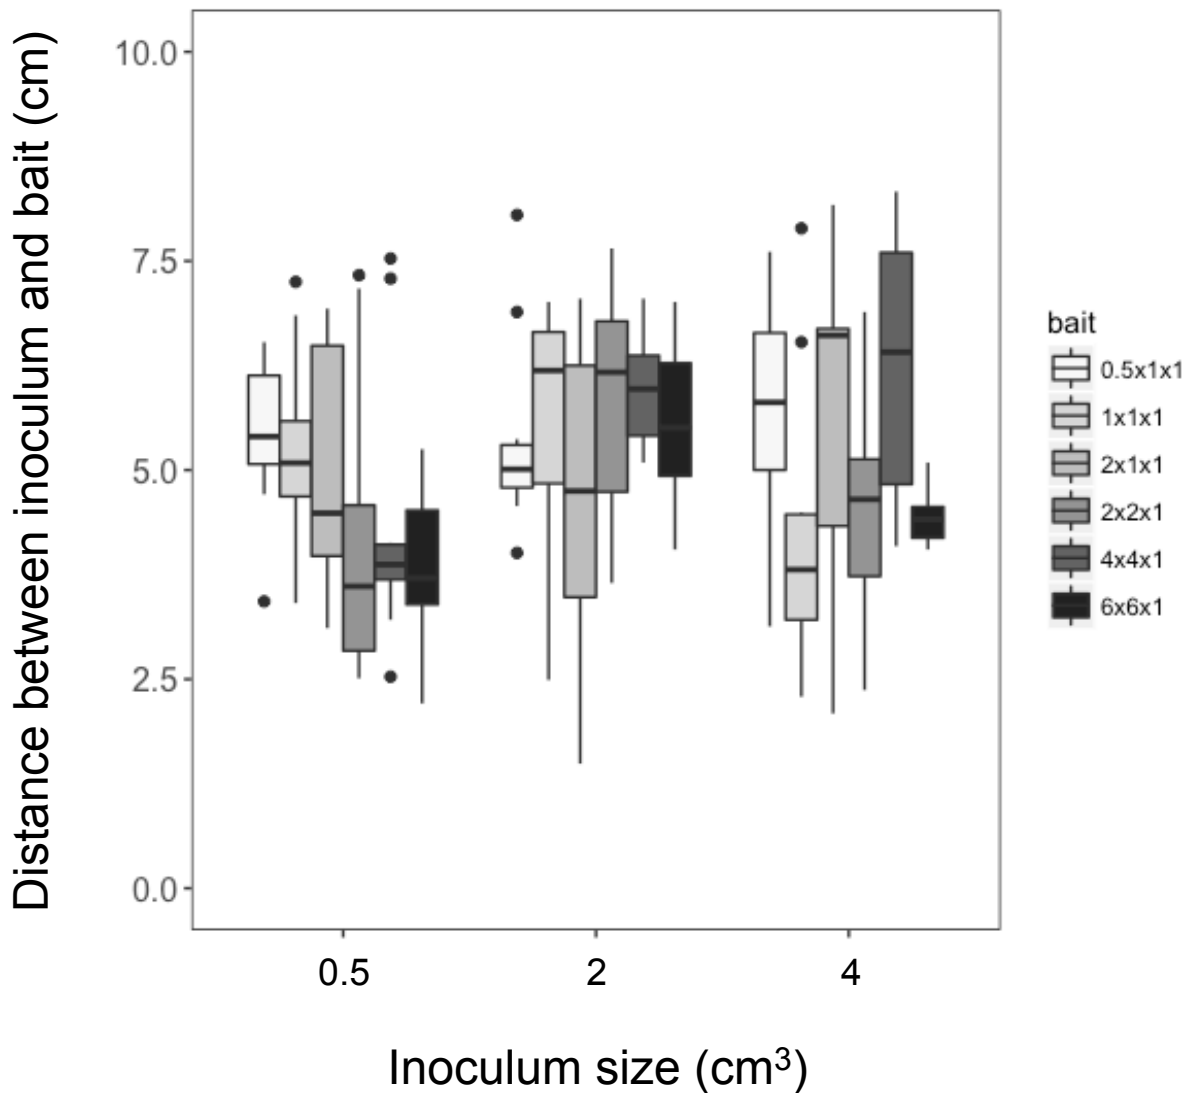

Fig. S2 Distance between inoculum and bait wood blocks in soil microcosms. A generalised linear model (Distance ~ Inoculum size + Bait size, family=gaussian) showed that inoculum and bait sizes both have significantly ( $P < 0.05$ ) associated with the distance.
