# Supplementary material for: Ecological memory and relocation decisions in fungal mycelial networks: responses to quantity and location of new resources
Source: PubMed Central journal article supplement (PMC6976561; doi:10.1038/s41396-019-0536-3), 2019-10-18
Supplement: 41396_2019_536_MOESM4_ESM.pdf [file 41396_2019_536_MOESM4_ESM.pdf]

0.5 cm<sup>3</sup> bait

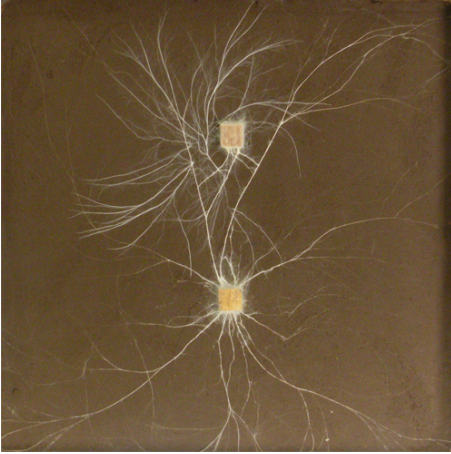

4 cm<sup>3</sup> bait

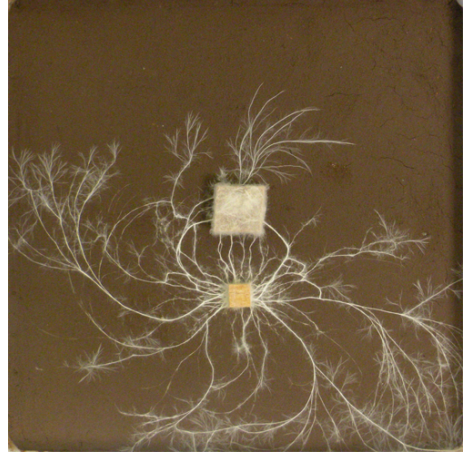

1 cm<sup>3</sup> bait

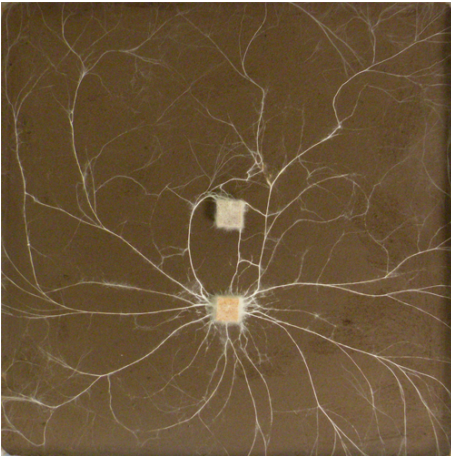

16 cm<sup>3</sup> bait

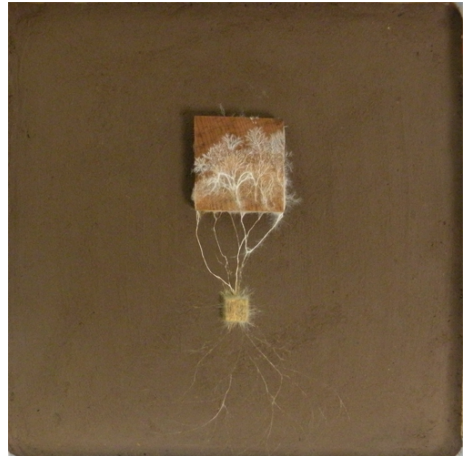

2 cm<sup>3</sup> bait

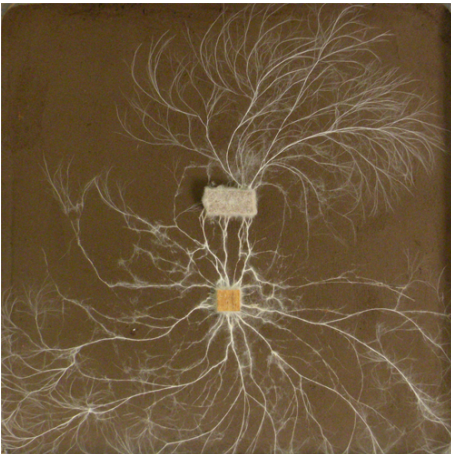

36 cm<sup>3</sup> bait

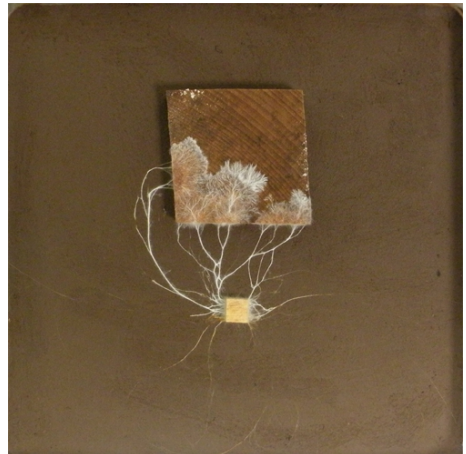

Fig. S4a Typical images of soil microcosms for 0.5 cm<sup>3</sup> inoculum 48 days after coupled with baits of six different sizes. Bottom blocks are inoculum and top blocks are bait.

0.5 cm<sup>3</sup> bait

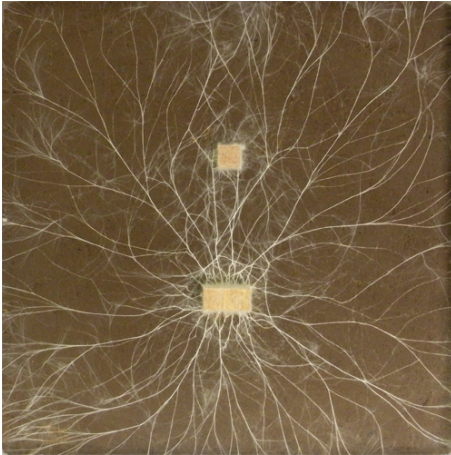

4 cm<sup>3</sup> bait

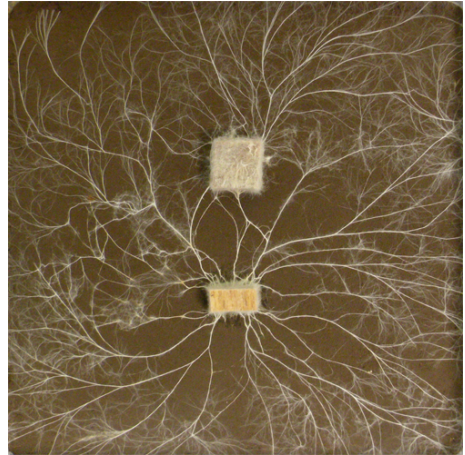

1 cm<sup>3</sup> bait

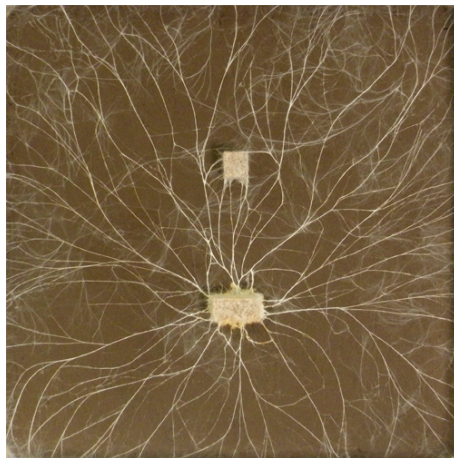

16 cm<sup>3</sup> bait

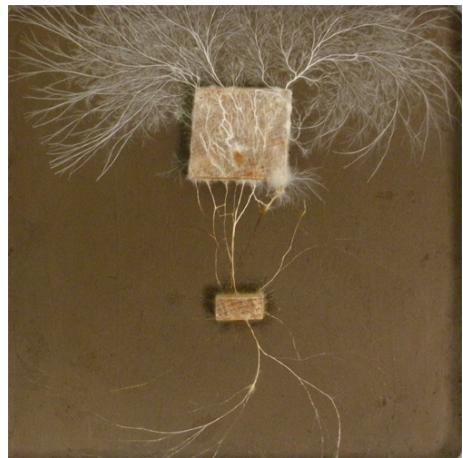

2 cm<sup>3</sup> bait

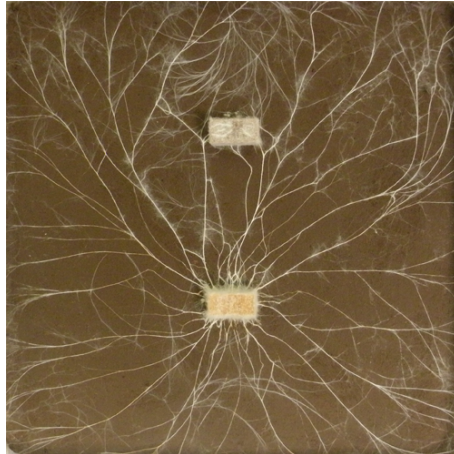

36 cm<sup>3</sup> bait

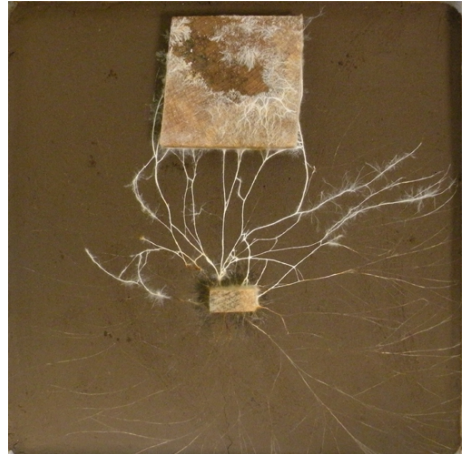

Fig. S4b Typical images of soil microcosms for 2 cm<sup>3</sup> inoculum 48 days after coupled with baits of six different sizes. Bottom blocks are inoculum and top blocks are bait.

0.5 cm<sup>3</sup> bait

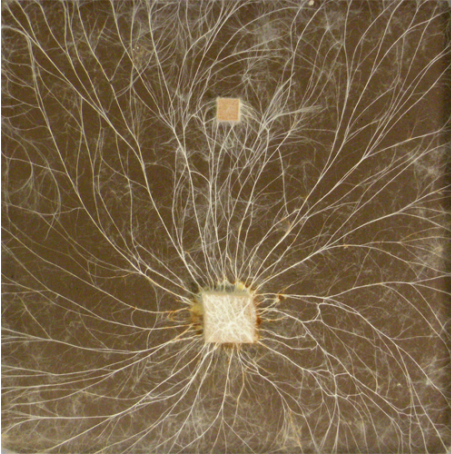

4 cm<sup>3</sup> bait

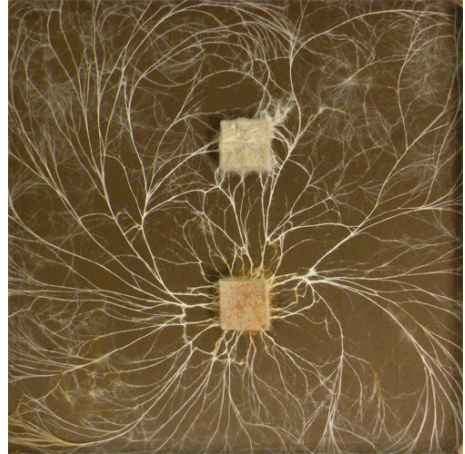

1 cm<sup>3</sup> bait

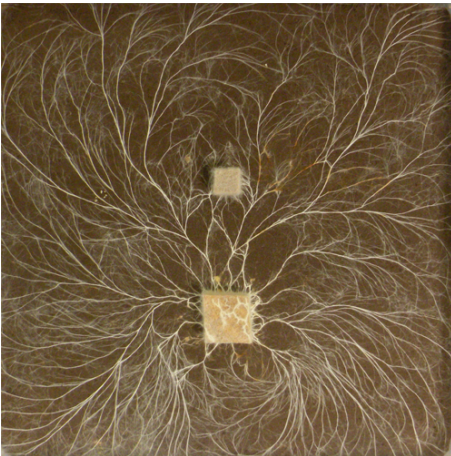

16 cm<sup>3</sup> bait

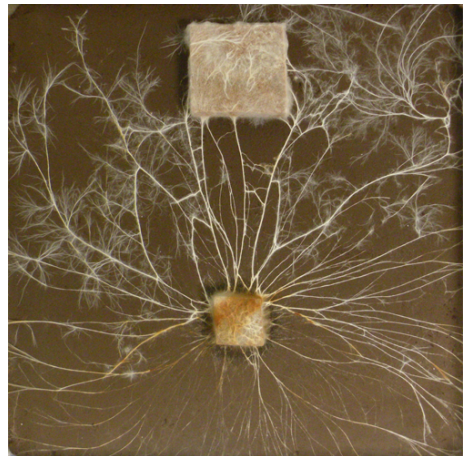

2 cm<sup>3</sup> bait

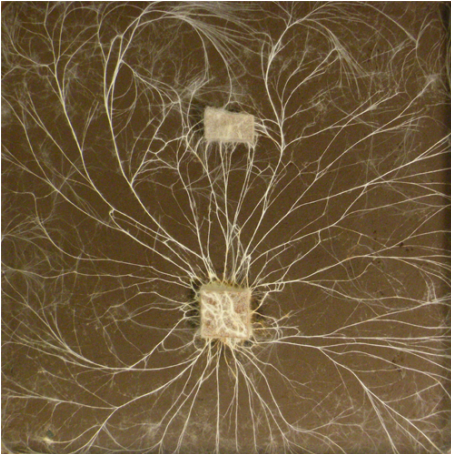

36 cm<sup>3</sup> bait

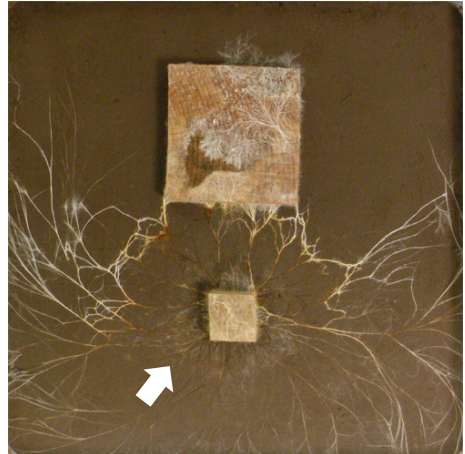

Fig. S4c Typical images of soil microcosms for 4 cm<sup>3</sup> inoculum 48 days after coupled with baits of six different sizes. Bottom blocks are inoculum and top blocks are bait. Arrow indicates dieback of mycelium surrounding inoculum.
